# Supplementary material for: Comparing Cardiovascular Outcomes and Costs of Perindopril-, Enalapril- or Losartan-Based Antihypertensive Regimens in South Africa: Real-World Medical Claims Database Analysis
Source: Springer Nature journal article supplement (doi:10.1007/s12325-023-02641-8), 2023-09-21
Supplement: MOESM1 [file 26069984]

**Comparing Cardiovascular Outcomes and Costs of Perindopril-, Enalapril- or Losartan-  
Based Antihypertensive Regimens in South Africa: Real-World Medical Claims Database**

**Analysis**

**Supplementary Material**

**Authors:** Jacques R. Snyman<sup>a</sup>, Freedom Gumedze<sup>b</sup>, Erika S. W. Jones<sup>c</sup>, Olufunke A. Alaba<sup>d</sup>, Nqoba Tsabedze<sup>e</sup>, Alykhan Vira<sup>f</sup>, Ntobeko A. B. Ntusi<sup>g\*</sup>

**Affiliations:** <sup>a</sup>Clinical Pharmacologist, Pretoria, South Africa; <sup>b</sup>Department of Statistical Sciences, University of Cape Town, Cape Town, South Africa; <sup>c</sup>Division of Nephrology and Hypertension, Department of Medicine, University of Cape Town and Groote Schuur Hospital, Cape Town, South Africa; <sup>d</sup>Health Economics Unit, School of Public Health and Family Medicine, University of Cape Town, Cape Town, South Africa; <sup>e</sup>Division of Cardiology, Department of Internal Medicine, School of Clinical Medicine, Faculty of Health Sciences, University of the Witwatersrand and the Charlotte Maxeke Johannesburg Academic Hospital, Johannesburg, South Africa; <sup>f</sup>Quantium Health South Africa, Johannesburg, South Africa; <sup>g</sup>Division of Cardiology, Department of Medicine, University of Cape Town and Groote Schuur Hospital, Cape Town, South Africa.

**\*Corresponding author:** Professor Ntobeko A. B. Ntusi

**Email:** [Ntobeko.Ntusi@uct.ac.za](mailto:Ntobeko.Ntusi@uct.ac.za)

## Supplementary Tables

**Supplementary Table S1** International Classification of Diseases (ICD) 10<sup>th</sup> revision codes for specific outcomes

| <b>Diagnostic episode grouper (DEG)</b> | <b>ICD Codes</b>                                                                                                                                                                                                                                                                                                                                                                                                                                                                                                                                                              |
|-----------------------------------------|-------------------------------------------------------------------------------------------------------------------------------------------------------------------------------------------------------------------------------------------------------------------------------------------------------------------------------------------------------------------------------------------------------------------------------------------------------------------------------------------------------------------------------------------------------------------------------|
| Ischaemic heart disease                 | I200 - Unstable angina, I259 - Chronic ischaemic heart disease, unspecified, I251 - Atherosclerotic heart disease, I209 - Angina pectoris, unspecified, I249 - Acute ischaemic heart disease, unspecified, I250 - Atherosclerotic cardiovascular disease, so described, I208 - Other forms of angina pectoris, I258 - Other forms of chronic ischaemic heart disease, I255 - Ischaemic cardiomyopathy, I248 - Other forms of acute ischaemic heart disease                                                                                                                    |
| Hypercholesterolaemia                   | E785 - Hyperlipidaemia, unspecified, E780 - Pure hypercholesterolaemia, E782 - Mixed hyperlipidaemia                                                                                                                                                                                                                                                                                                                                                                                                                                                                          |
| Acute myocardial infarction             | I219 - Acute myocardial infarction, unspecified, I210 - Acute transmural myocardial infarction of anterior wall, I211 - Acute transmural myocardial infarction of inferior wall, I214 - Acute subendocardial myocardial infarction, I213 - Acute transmural myocardial infarction of unspecified site, I212 - Acute transmural myocardial infarction of other sites                                                                                                                                                                                                           |
| Cardiac failure                         | I500 - Congestive heart failure, I509 - Heart failure, unspecified, I420 - Dilated cardiomyopathy, I501 - Left ventricular failure, I429 - Cardiomyopathy, unspecified                                                                                                                                                                                                                                                                                                                                                                                                        |
| Arrhythmia                              | I489 - Atrial fibrillation and atrial flutter, unspecified, I499 - Cardiac arrhythmia, unspecified, I442 - Atrioventricular block, complete, I480 - Paroxysmal atrial fibrillation, I495 - Sick sinus syndrome, I481 - Persistent atrial fibrillation, I482 - Chronic atrial fibrillation, I472 - Ventricular tachycardia, I471 - Supraventricular tachycardia, I483 - Typical atrial flutter, I455 - Other specified heart block, I421 - Obstructive hypertrophic cardiomyopathy, I441 - Atrioventricular block, second degree, I447 - Left bundle-branch block, unspecified |

|                       |                                                                                                                                                                                                                                                                                                                                                                                                                                                                                                                                                                                                                                                                                                                                  |
|-----------------------|----------------------------------------------------------------------------------------------------------------------------------------------------------------------------------------------------------------------------------------------------------------------------------------------------------------------------------------------------------------------------------------------------------------------------------------------------------------------------------------------------------------------------------------------------------------------------------------------------------------------------------------------------------------------------------------------------------------------------------|
| Aneurysm              | I714 - Abdominal aortic aneurysm, without mention of rupture, I712 - Thoracic aortic aneurysm, without mention of rupture, I713 - Abdominal aortic aneurysm, ruptured, I724 - Aneurysm and dissection of artery of lower extremity, I723 - Aneurysm and dissection of Iliac artery, I728 - Aneurysm and dissection of other specified arteries, I722 - Aneurysm and dissection of renal artery, I712 - Thoracic aortic aneurysm, without mention of rupture, I721 - Aneurysm and dissection of artery of upper extremity, I253 - Aneurysm of heart, I719 - Aortic aneurysm of unspecified site, without mention of rupture                                                                                                       |
| Diabetes type 1 or 2  | E119 - Type 2 diabetes mellitus without complications, E109 - Type 1 diabetes mellitus without complications, E113 - Type 2 diabetes mellitus with ophthalmic complications, E103 - Type 1 diabetes mellitus with ophthalmic complications, E115 - Type 2 diabetes mellitus with peripheral circulatory complications, E105 - Type 1 diabetes mellitus with peripheral circulatory complications, E101 - Type 1 diabetes mellitus with ketoacidosis, E118 - Type 2 diabetes mellitus with unspecified complications, E108 - Type 1 diabetes mellitus with unspecified complications, E109 - Type 1 diabetes mellitus without complications, E111 - Type 2 diabetes mellitus with ketoacidosis, E162 - Hypoglycaemia, unspecified |
| Chronic renal failure | N189 - Chronic kidney disease, unspecified, N185 - Chronic kidney disease, stage 5, N179 - Acute renal failure, unspecified, I120 - Hypertensive renal disease with renal failure, N179 - Acute renal failure, unspecified, N184 - Chronic kidney disease, stage 4                                                                                                                                                                                                                                                                                                                                                                                                                                                               |
| Stroke                | I613 - Intracerebral haemorrhage in brain stem, I606 - Subarachnoid haemorrhage from other intracranial arteries, I671 - Cerebral aneurysm, nonruptured, I610 - Intracerebral haemorrhage in hemisphere, subcortical, G451 - Carotid artery syndrome (hemispheric), R908 - Other abnormal findings on diagnostic Imaging of central nervous system, I634 - Cerebral infarction due to embolism of cerebral arteries, I629 - Intracranial haemorrhage (nontraumatic), unspecified, G458 - Other transient cerebral ischaemic attacks and related syndromes, I636 - Cerebral infarction due to cerebral venous thrombosis, nonpyogenic, I619 - Intracerebral haemorrhage, unspecified, I679 - Cerebrovascular disease,             |

unspecified, I678 - Other specified cerebrovascular diseases, I638 - Other cerebral infarction, I635 - Cerebral infarction due to unspecified occlusion or stenosis of cerebral arteries, I633 - Cerebral infarction due to thrombosis of cerebral arteries, I620 - Subdural haemorrhage (acute)(nontraumatic), I652 - Occlusion and stenosis of carotid artery, I639 - Cerebral infarction, unspecified, G459 - Transient cerebral ischaemic attack, unspecified, I64 - Stroke, not specified as haemorrhage or infarction

Vascular dementia

F019 - Vascular dementia, unspecified, F011 - Multi-infarct dementia, F010 - Vascular dementia of acute onset, F012 - Subcortical vascular dementia, F013 - Mixed cortical and subcortical vascular dementia, F018 - Other vascular dementia

---

**Supplementary Table S2** Anatomical Therapeutic Chemical (ATC) codes used to identify medication claims

| <b>ATC_CODE<sup>a</sup></b> | <b>ATC_DESCRIPTION</b>     |
|-----------------------------|----------------------------|
| C09AA04                     | PERINDOPRIL                |
| C09BB04                     | PERINDOPRIL AND AMLODIPINE |
| C09BA04                     | PERINDOPRIL AND DIURETICS  |
| C09CA01                     | LOSARTAN                   |
| C09DB06                     | LOSARTAN AND AMLODIPINE    |
| C09DA01                     | LOSARTAN AND DIURETICS     |
| C09AA02                     | ENALAPRIL                  |
| C09BA02                     | ENALAPRIL AND DIURETICS    |

<sup>a</sup>These codes represent all products containing perindopril, losartan and enalapril in the medical claims database. Other ATC codes used to denote these molecules were not assigned to actively dispensed drugs during the study period 2015–2019

**Supplementary Table S3** Number of patients using each RAAS inhibitor agent

The most common RAAS inhibitors used during the study period 2015–2019 were identified using the ATC class, and both plain and combination versions of the RAAS inhibitors were included in the analyses. The top three RAAS inhibitors were perindopril, losartan and enalapril, which together accounted for 61% of all patients receiving any RAAS inhibitor in the medical insurance database over the period from 2015 to 2019

| <b>RAAS inhibitor agent</b> | <b>Number of patients claiming use</b> |
|-----------------------------|----------------------------------------|
| Perindopril                 | 235,138                                |
| Losartan                    | 108,943                                |
| Enalapril                   | 99,345                                 |
| Valsartan                   | 98,776                                 |
| Lisinopril                  | 62,064                                 |
| Telmisartan                 | 60,280                                 |
| Captopril                   | 14,937                                 |
| Others                      | 42,683                                 |

ATC Anatomical Therapeutic Chemical, RAAS renin-angiotensin-aldosterone system

**Supplementary Table S4** Sensitivity analyses, including all patients (*N* = 108,820)

| Parameter                                                               | Perindopril | Losartan | Mean difference<br>(95% CI) for<br>perindopril–<br>losartan | <i>P</i> -value | Perindopril | Enalapril | Mean difference<br>(95% CI) for<br>perindopril–<br>enalapril | <i>P</i> -value |
|-------------------------------------------------------------------------|-------------|----------|-------------------------------------------------------------|-----------------|-------------|-----------|--------------------------------------------------------------|-----------------|
| Total cost (ZAR <sup>a</sup> PLPM)                                      | 1458        | 1578     | –120 (–206, –36)                                            | 0.0050          | 1458        | 1621      | –163 (–369, –57)                                             | 0.0026          |
| Primary composite outcome<br>(events per 1000 patients<br>over 5 years) | 216         | 245      | –                                                           | < 0.001         | 216         | 241       | –                                                            | < 0.001         |
| Patients with primary<br>composite outcome (%)                          | 14.9        | 16.7     | –                                                           | < 0.001         | 14.9        | 17.1      | –                                                            | < 0.001         |

*PLPM* per life per month, ZAR South African Rands

<sup>a</sup>The average rate of exchange for the ZAR between 2015 and 2019 (the study period) was ZAR 137 019.20 per \$US 1 [1]

**Supplementary Table S5** Non-risk-adjusted outcomes

|                                                              | <b>Perindopril</b> | <b>Losartan</b> | <b>Enalapril</b> |
|--------------------------------------------------------------|--------------------|-----------------|------------------|
| <b>Clinical outcomes</b>                                     |                    |                 |                  |
| Hospitalisation event rate (per 1000 patients)               | 212                | 223             | 210              |
| Heart Failure                                                | 42                 | 42              | 44               |
| Stroke                                                       | 55                 | 61              | 60               |
| MI                                                           | 22                 | 23              | 26               |
| IHD                                                          | 93                 | 97              | 80               |
| Patients with new occurrence of a composite outcome event, % | 15.6               | 16.9            | 16.2             |
| Mortality rate (deaths per 1000 patients)                    | 103                | 95              | 131              |
| <b>Cost outcomes, mean (95% CI), ZAR</b>                     |                    |                 |                  |
| Total PLPM                                                   | 1381 (87–8973)     | 1480 (104–9365) | 1448 (77–10446)  |
| Hospital (inpatient)                                         | 770 (0–7452)       | 807 (0–7586)    | 856 (0–8810)     |
| Pharmacotherapy                                              | 355 (55–1273)      | 379 (73–1451)   | 330 (45–1363)    |
| GP (outpatient)                                              | 44 (0–146)         | 49 (0–161)      | 47 (0–168)       |
| Specialist (inpatient)                                       | 56 (0–412)         | 56 (0–410)      | 41 (0–347)       |
| Other <sup>a</sup>                                           | 156 (0–547)        | 189 (0–621)     | 173 (0–554)      |

*CI* confidence interval, *GP* general practitioner, *PLPM* per life per month, *ZAR* South African Rands

<sup>a</sup>Includes radiology, pathology and allied healthcare services



**Supplementary Table S6** Antihypertensive drug use

| Therapy                          | Patients receiving therapy (%) |            |            |            |
|----------------------------------|--------------------------------|------------|------------|------------|
|                                  | Perindopril                    | Losartan   | Enalapril  | Total      |
| Monotherapy                      | 11                             | 10         | 13         | 11         |
| Adjunctive therapy               |                                |            |            |            |
| Diuretics                        | 26                             | 26         | 25         | 26         |
| Diuretics + beta-blockers        | 14                             | 14         | 12         | 14         |
| CCBs                             | 6                              | 5          | 5          | 5          |
| CCBs + beta-blockers             | 3                              | 3          | 3          | 3          |
| Diuretics + CCBs                 | 19                             | 20         | 20         | 19         |
| Diuretics + CCBs + beta-blockers | 17                             | 19         | 17         | 17         |
| Beta-blockers                    | 5                              | 4          | 4          | 4          |
| <b>Total</b>                     | <b>100</b>                     | <b>100</b> | <b>100</b> | <b>100</b> |

CCB calcium channel blocker

## References

1. Nedbank. Average annual exchange rates. 2021.  
[https://www.nedbank.co.za/content/dam/nedbank/site-assets/AboutUs/Economics\\_Unit/Forecast\\_and\\_data/Daily\\_Rates/Annual\\_Average\\_Exchange\\_Rates.pdf](https://www.nedbank.co.za/content/dam/nedbank/site-assets/AboutUs/Economics_Unit/Forecast_and_data/Daily_Rates/Annual_Average_Exchange_Rates.pdf). Accessed 18 July 2022.
